# Supplementary material for: Radical chain mechanism for the S 2 O 8 2− –S 2 O 3 2− –Cu( ii ) flow system explains high-amplitude pH oscillations in the NH 4 OH-modified version
Source: Royal Society of Chemistry journal article supplement (doi:10.1039/d4ra02863e), 2024-01-01
Supplement: d4ra02863e1.pdf [file d4ra02863e1.pdf]

## Electronic Supplementary Information

### Radical chain mechanism for the $S_2O_8^{2-} - S_2O_3^{2-} - Cu(II)$ flow system explains high-amplitude pH oscillations in the $NH_4OH$ -modified version

Krisztina Kurin-Csörgei, István Szalai and Miklós Orbán

Laboratory of Nonlinear Chemical Dynamics, Institute of Chemistry, Eötvös University,

Pázmány Péter sétány 1/A, Budapest 1117, Hungary

Derivation of the kinetic differential equations

Rate laws:

$$v_1 = k_1 [S_2O_3^{2-}] [Cu^{2+}]$$

$$v_2 = k_2 [S_2O_3^-]^2$$

$$v_3 = k_3 [S_2O_8^{2-}] [Cu^+]$$

$$v_4 = k_4 [SO_4^-]^2$$

$$v_5 = k_5 [SO_4^-]$$

$$v_6 = k_6 [S_2O_3^{2-}] [OH\cdot]$$

$$v_7 = k_7 [S_2O_8^{2-}] [SO_4^-]$$

$$v_8 = k_8 [S_2O_8^-]$$

$$v_9 = k_9 [S_2O_3^-] [O_2] [H^+]$$

$$v_{10} = k_{10} [OH\cdot]^2$$

$$v_{11} = k_{11} [S_2O_8^{2-}] [H_2O_2]$$

$$v_{12} = k_{12} [S_2O_3^-] [SO_4^-]$$

$$v_{13} = k_{13} [S_2O_3^{2-}] [S_2O_3SO_4^{2-}]$$

$$v_{14} = k_{14}^f [HSO_4^-] - k_{14}^b [H^+] [SO_4^{2-}]$$

$$v_{15} = k_{15}^f [H^+] [OH^-] - k_{15}^b$$

$$v_{16} = k_{16}^f [NH_3] - k_{16}^b [NH_4^+] [OH^-]$$

Differential equations for the simulations of the CSTR behavior:

$$d[S_2O_3^{2-}]/dt = -v_1 - v_6 - v_{13} + k_0([S_2O_3^{2-}]_0 - [S_2O_3^{2-}])$$

$$d[Cu^{2+}]/dt = -v_1 + v_3 + k_0([Cu^{2+}]_0 - [Cu^{2+}])$$

$$d[S_2O_3^-]/dt = v_1 - 2v_2 + v_6 - v_9 - v_{12} + k_0([S_2O_3^-]_0 - [S_2O_3^-])$$

$$d[Cu^+]/dt = v_1 - v_3 + k_0([Cu^+]_0 - [Cu^+])$$

$$d[S_4O_6^{2-}]/dt = v_2 + v_{13} + k_0([S_4O_6^{2-}]_0 - [S_4O_6^{2-}])$$

$$d[S_2O_8^{2-}]/dt = -v_3 + v_4 - v_7 - v_{10} + k_0([S_2O_8^{2-}]_0 - [S_2O_8^{2-}])$$

$$d[SO_4^-]/dt = v_3 - 2v_4 - v_5 - v_7 + 2v_8 - v_{12} + k_0([SO_4^-]_0 - [SO_4^-])$$

$$d[SO_4^{2-}]/dt = v_3 + v_{14} + v_7 + v_{13} + k_0([SO_4^{2-}]_0 - [SO_4^{2-}])$$

$$d[HSO_4^-]/dt = -v_{14} + v_5 + 2v_{11} + k_0([HSO_4^-]_0 - [HSO_4^-])$$

$$d[OH\cdot]/dt = v_5 - v_6 + v_8 - 2v_{10} + k_0([OH\cdot]_0 - [OH\cdot])$$

$$d[H^+]/dt = -v_{15} + v_{14} - v_9 + v_8 + k_0([H^+]_0 - [H^+])$$

$$d[OH^-]/dt = -v_{15} + v_6 + v_{16} + k_0([OH^-]_0 - [OH^-])$$

$$d[S_2O_8^-]/dt = v_7 - v_8 + k_0([S_2O_8^-]_0 - [S_2O_8^-])$$

$$d[O_2]/dt = -v_9 + v_{11} + k_0([O_2]_0 - [O_2])$$

$$d[H_2O_2]/dt = v_{10} - v_{11} + k_0([H_2O_2]_0 - [H_2O_2])$$

$$d[S_2O_3SO_4^{2-}]/dt = v_{12} - v_{13} + k_0([S_2O_3SO_4^{2-}]_0 - [S_2O_3SO_4^{2-}])$$

$$d[HN_3]/dt = -v_{16} + k_0([HN_3]_0 - [HN_3])$$

$$d[HN_4^+]/dt = v_{16} + k_0([HN_4^+]_0 - [HN_4^+])$$

Supplementary Figures

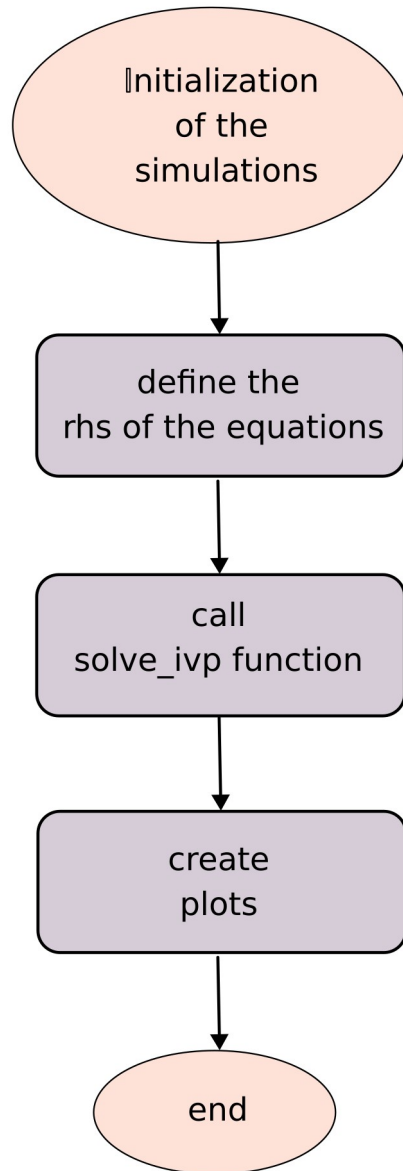

Figure S1. Flowhart of the numerical simulations.

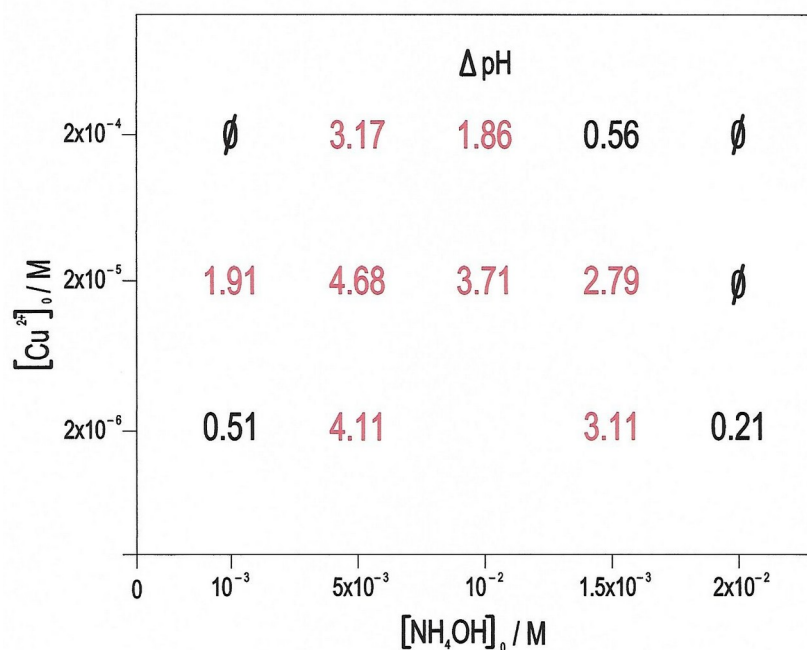

Figure S2. Amplitude of the high amplitude pH oscillations ( $\Delta \text{pH}$ ) in the  $[\text{Cu}^{2+}]_0 - [\text{NH}_4\text{OH}]_0$  plane at fixed  $[\text{S}_2\text{O}_8^{2-}] = 0.02 \text{ M}$ ,  $[\text{S}_2\text{O}_3^{2-}] = 0.005 \text{ M}$ ,  $k_0 = 2 \times 10^{-3}$ ,  $T = 25 \text{ }^\circ\text{C}$ .

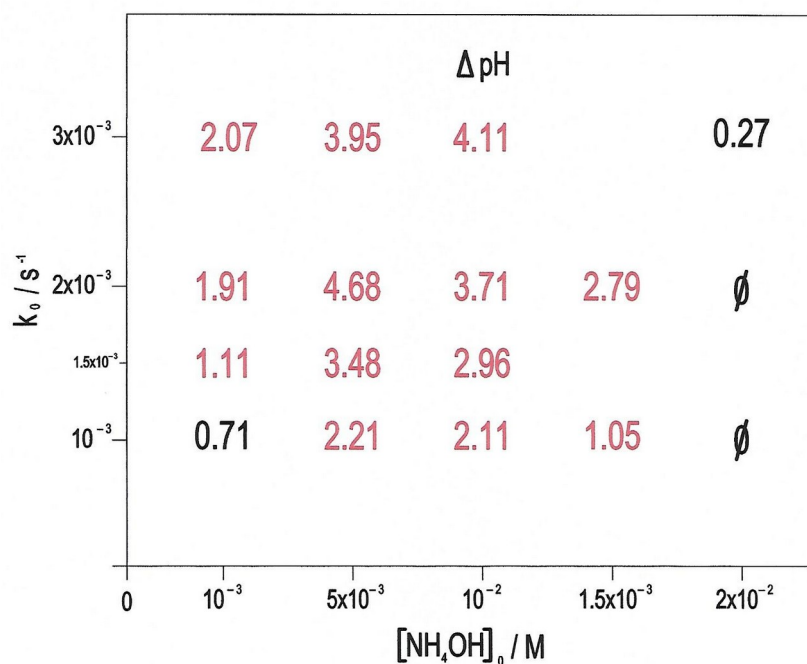

Figure S3. Amplitude of the high amplitude pH oscillations ( $\Delta \text{pH}$ ) in the  $(k_0) - [\text{NH}_4\text{OH}]_0$  plane at fixed  $[\text{S}_2\text{O}_8^{2-}] = 0.02 \text{ M}$ ,  $[\text{S}_2\text{O}_3^{2-}] = 0.005 \text{ M}$ ,  $[\text{Cu}^{2+}] = 2 \times 10^{-5} \text{ M}$ ,  $T = 25 \text{ }^\circ\text{C}$ .

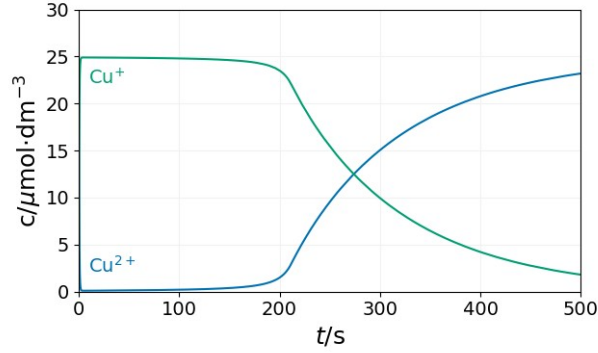

Figure S4. Simulation of the batch dynamics of the peroxydisulfate-thiosulfate-copper(II) reaction. The parameters used in the simulations are:  $[\text{S}_2\text{O}_3^{2-}]_0 = 0.0025 \text{ M}$ ,  $[\text{S}_2\text{O}_8^{2-}]_0 = 0.025 \text{ M}$ ,  $[\text{Cu}^{2+}]_0 = 2.5 \times 10^{-5} \text{ M}$ ,  $[\text{H}^+]_0 = 10^{-5} \text{ M}$ .

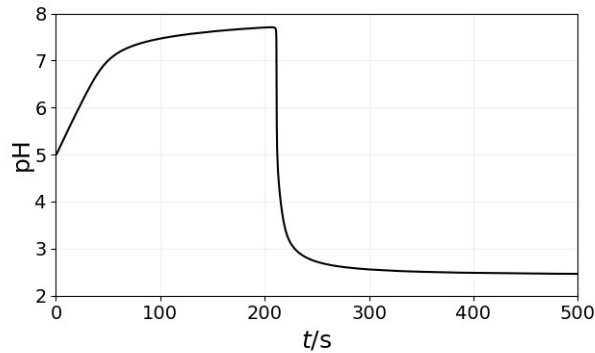

Figure S5. Simulation of the batch dynamics of the peroxydisulfate-thiosulfate-copper(II) reaction. The parameters used in the simulations are:  $[\text{S}_2\text{O}_3^{2-}]_0 = 0.0025 \text{ M}$ ,  $[\text{S}_2\text{O}_8^{2-}]_0 = 0.025 \text{ M}$ ,  $[\text{Cu}^{2+}]_0 = 2.5 \times 10^{-5} \text{ M}$ ,  $[\text{H}^+]_0 = 10^{-5} \text{ M}$ .

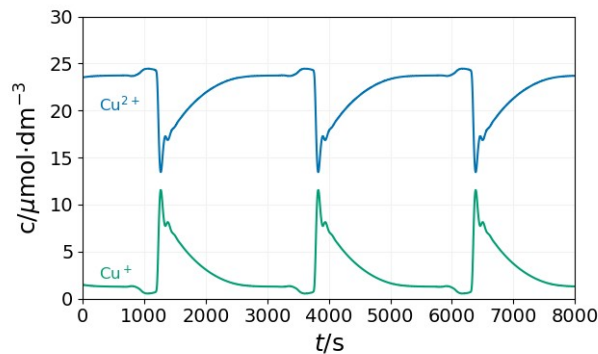

Figure S6. Simulation of the CSTR dynamics of the peroxydisulfate-thiosulfate-copper(II) reaction. The parameters used in the simulations are:  $[\text{S}_2\text{O}_3^{2-}]_0 = 0.0025 \text{ M}$ ,  $[\text{S}_2\text{O}_8^{2-}]_0 = 0.025 \text{ M}$ ,  $[\text{Cu}^{2+}]_0 = 2.5 \times 10^{-5} \text{ M}$ ,  $[\text{H}^+]_0 = 10^{-5} \text{ M}$ ,  $k_0 = 1.2 \times 10^{-3} \text{ s}^{-1}$ .

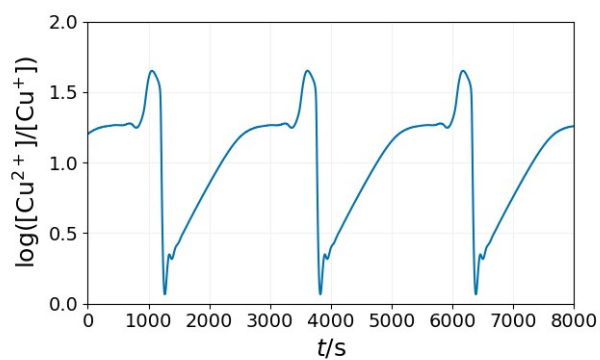

Figure S7. Simulation of the CSTR dynamics of the peroxodisulfate-thiosulfate-copper(II) reaction. The parameters used in the simulations are:  $[\text{S}_2\text{O}_3^{2-}]_0 = 0.0025 \text{ M}$ ,  $[\text{S}_2\text{O}_8^{2-}]_0 = 0.025 \text{ M}$ ,  $[\text{Cu}^{2+}]_0 = 2.5 \times 10^{-5} \text{ M}$ ,  $[\text{H}^+]_0 = 10^{-5} \text{ M}$ ,  $k_0 = 1.2 \times 10^{-3} \text{ s}^{-1}$ .

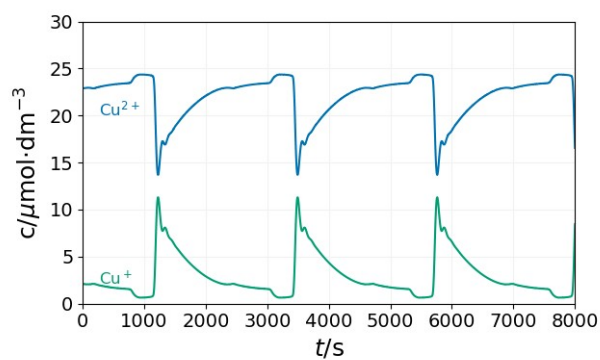

Figure S8. Simulation of the CSTR dynamics of the peroxodisulfate-thiosulfate-copper(II) reaction in presence of ammonia. The parameters used in the simulations are:  $[\text{S}_2\text{O}_3^{2-}]_0 = 0.0025 \text{ M}$ ,  $[\text{S}_2\text{O}_8^{2-}]_0 = 0.025 \text{ M}$ ,  $[\text{Cu}^{2+}]_0 = 2.5 \times 10^{-5} \text{ M}$ ,  $[\text{H}^+]_0 = 10^{-5} \text{ M}$ ,  $[\text{NH}_3]_0 = 5 \times 10^{-4} \text{ M}$ ,  $k_0 = 1.2 \times 10^{-3} \text{ s}^{-1}$ .

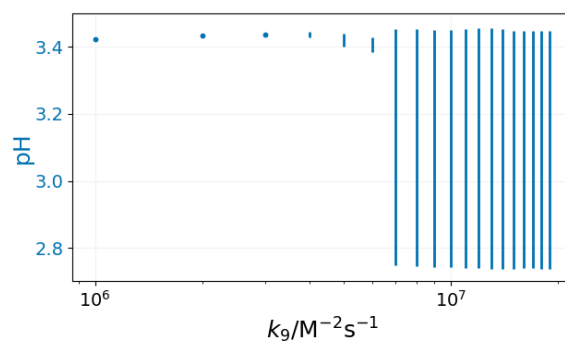

Figure S9. Simulated bifurcation diagram of the CSTR dynamics of the peroxodisulfate-thiosulfate-copper(II) reaction in absence of ammonia. The parameters used in the simulations are:  $[S_2O_3^{2-}]_0 = 0.0025$  M,  $[S_2O_8^{2-}]_0 = 0.025$  M,  $[Cu^{2+}]_0 = 2.5 \times 10^{-5}$  M,  $[H^+]_0 = 10^{-5}$  M,  $k_0 = 1.2 \times 10^{-3}$  s $^{-1}$ .

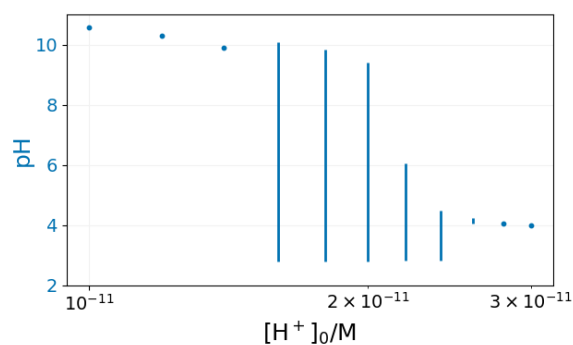

Figure S10. Simulated bifurcation diagram of the CSTR dynamics of the peroxodisulfate-thiosulfate-copper(II) reaction in absence of ammonia. The parameters used in the simulations are:  $[S_2O_3^{2-}]_0 = 0.0025$  M,  $[S_2O_8^{2-}]_0 = 0.025$  M,  $[Cu^{2+}]_0 = 2.5 \times 10^{-5}$  M,  $k_0 = 1.2 \times 10^{-3}$  s $^{-1}$ .
